# Supplementary material for: Transition metal M (M = Co, Ni, and Fe) and boron co-modulation in Rh-based aerogels for highly efficient and pH-universal hydrogen evolution electrocatalysis
Source: Royal Society of Chemistry journal article supplement (doi:10.1039/d0ta00398k), 2020-01-01
Supplement: d0ta00398k1.pdf [file d0ta00398k1.pdf]

## Electronic Supplementary Information

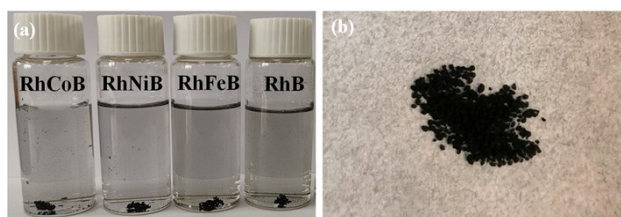

**Fig. S1** (a) Photograph of the obtained aerogels in aqueous solutions. (b) Photograph of the typical RhCoB aerogel.

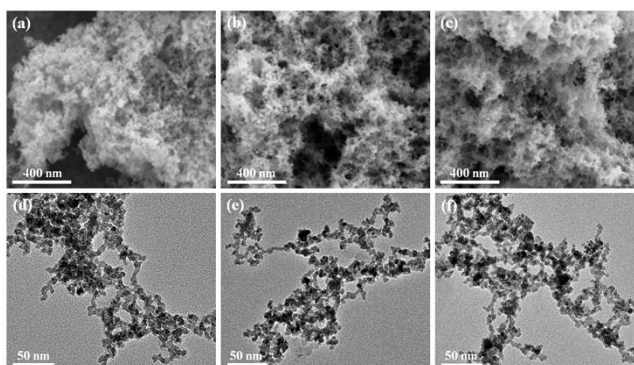

**Fig. S2** (a-c) SEM and (d-f) TEM images and of various samples: (a, d) RhB, (b, e) RhNiB, and (c, f) RhFeB aerogels.

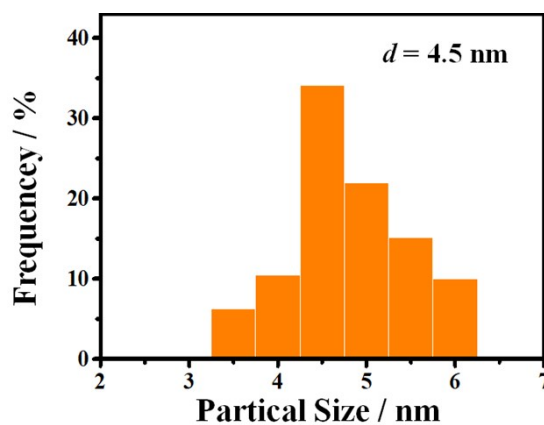

**Fig. S3** Particle-size distribution histogram of the RhCoB aerogels.

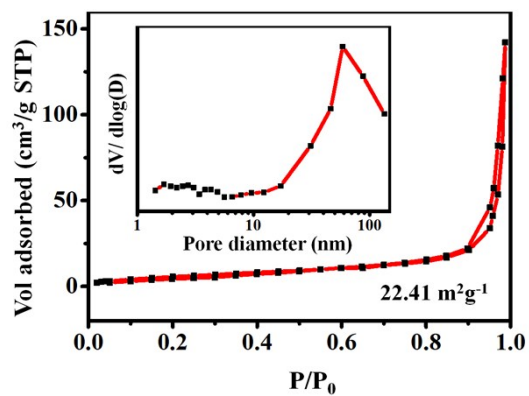

**Fig. S4** N<sub>2</sub> adsorption-desorption isotherm for the RhCoB aerogels. The inset is the BJH pore-size distribution curve.

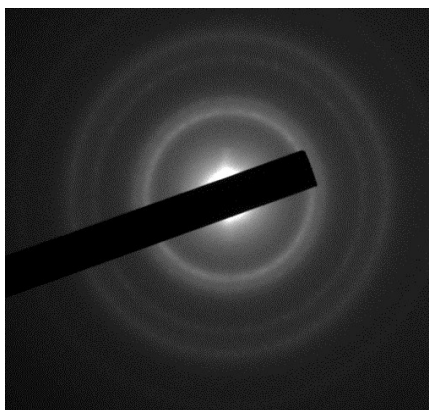

**Fig. S5** the SAED pattern of the RhCoB aerogels.

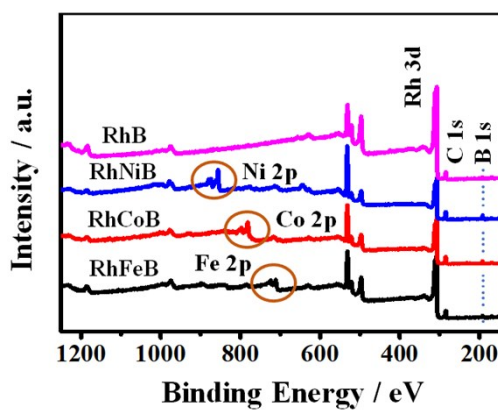

**Fig. S6** XPS spectra of the RhB, RhNiB, RhCoB, and RhFeB aerogels.

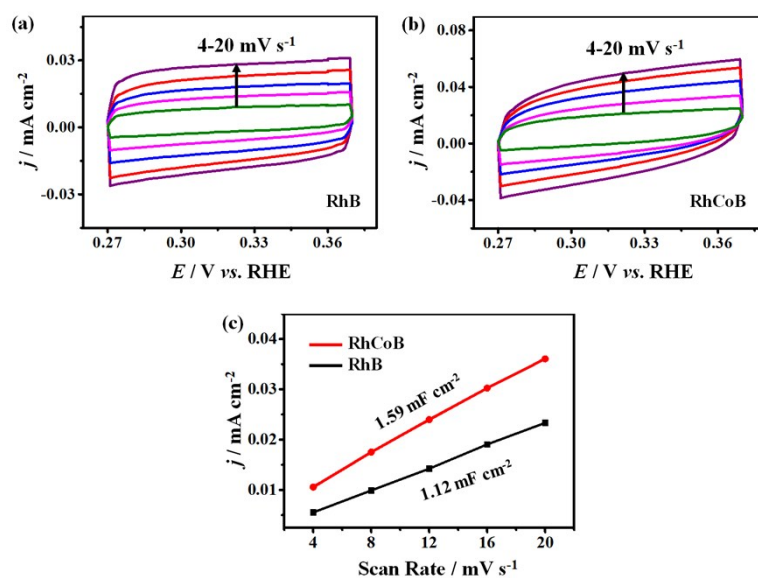

**Fig. S7** (a-b) CVs and (c) the corresponding  $C_{dl}$  of RhB and RhCoB aerogels.

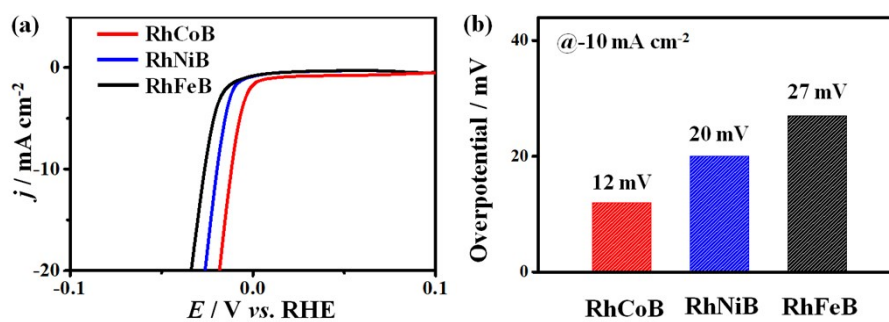

**Fig. S8** (a) Polarization curves for various RhMB aerogels obtained in 0.5 M H<sub>2</sub>SO<sub>4</sub> electrolyte. (b) Comparison of the overpotentials at -10 mA cm<sup>-2</sup>.

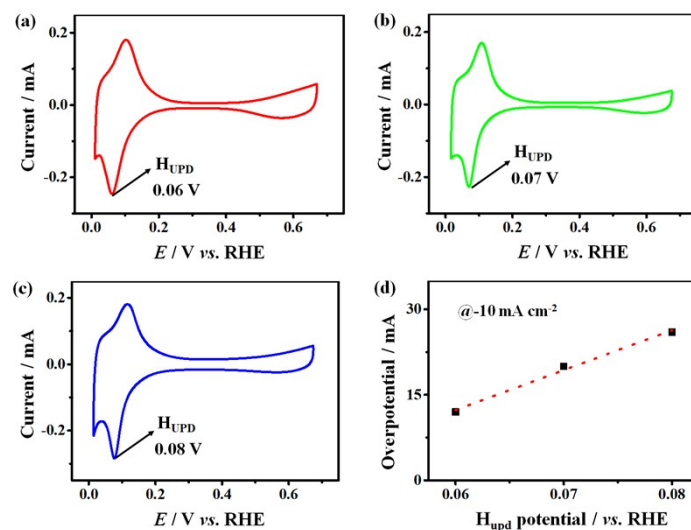

**Fig. S9**  $H_{UPD}$  behavior of (a) RhCoB, (b) RhNiB and (c) RhFeB aerogels with scan rate of  $50 \text{ mV s}^{-1}$ . (d) Relationships between HER activity and  $H_{UPD}$  potential on RhCoB, RhNiB, and RhFeB aerogels. The scan rate for CV curves is  $50 \text{ mV s}^{-1}$ .

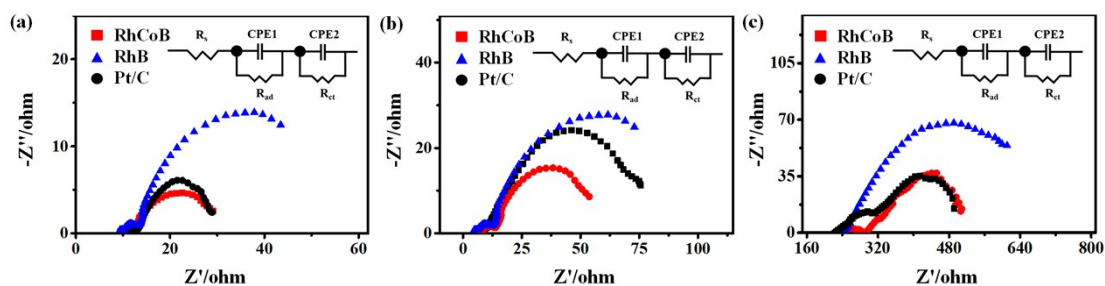

**Fig. S10** Nyquist plots of RhCoB aerogels obtained in (a)  $0.5 \text{ M H}_2\text{SO}_4$  with an overpotential of  $50 \text{ mV}$ , (b)  $1 \text{ M KOH}$  with an overpotential of  $100 \text{ mV}$ , and (c)  $1 \text{ M PBS}$  with an overpotential of  $300 \text{ mV}$ .

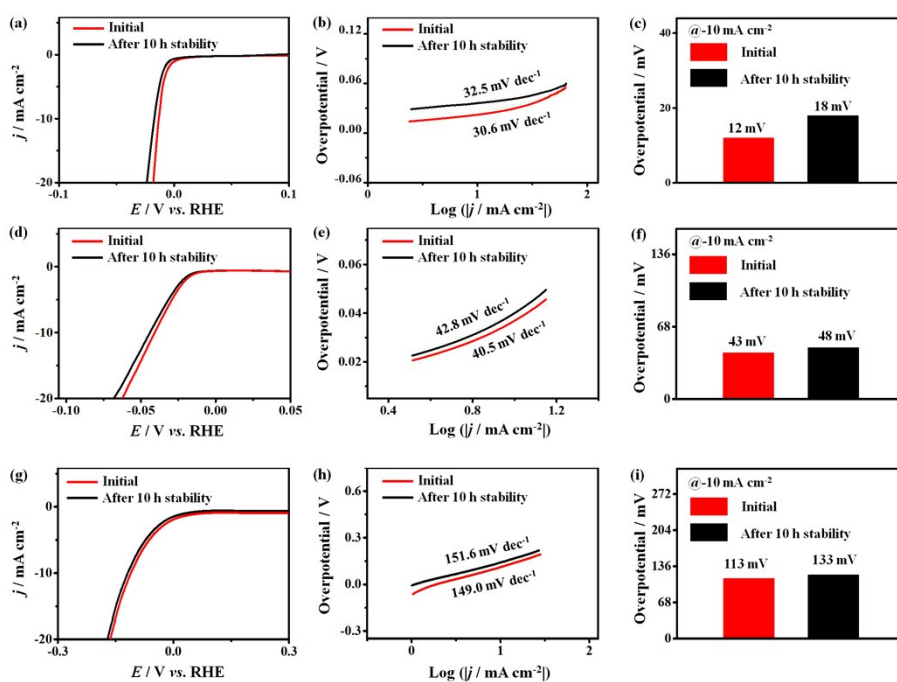

**Fig. S11** (a, d, g) Polarization curves of RhCoB aerogels before and after 10 h chronopotentiometric (V-t) stability in acidic (a), alkaline (d), and neutral (g) electrolytes, respectively. (b, e, h) The corresponding Tafel slopes derived from a, d, g, respectively. (c, f, i) Comparison of the required overpotentials at  $-10 \text{ mA cm}^{-2}$ .

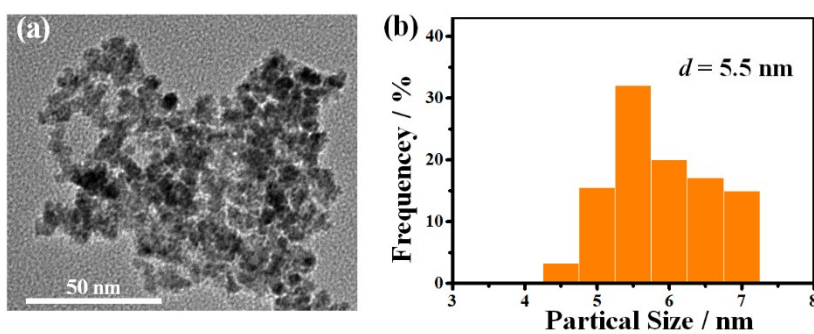

**Fig. S12** (a) TEM image and (b) particle-size distribution histogram of the RhCoB aerogels after catalytic stability testing.

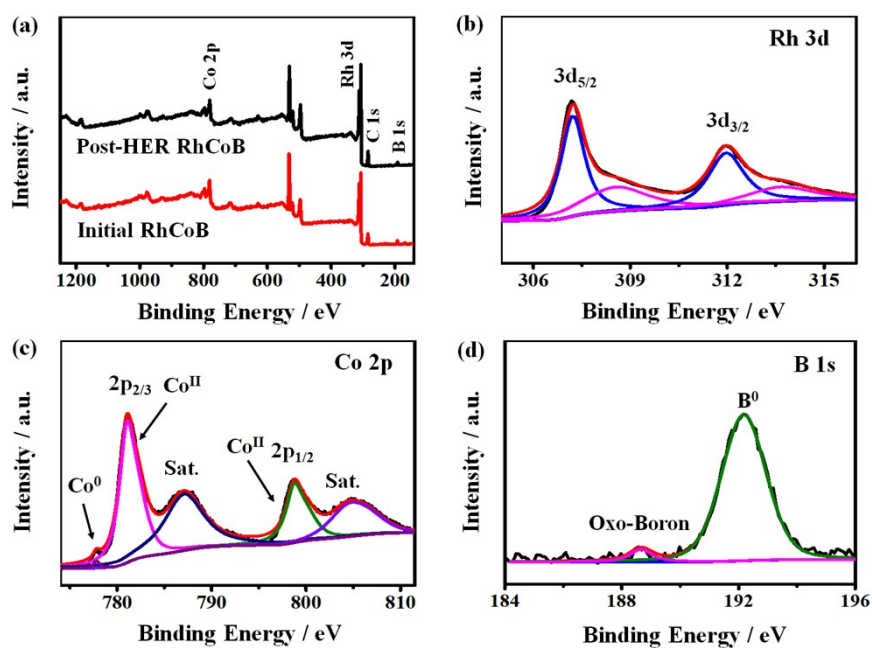

**Fig. S13** (a) XPS survey spectra of initial and post-HER RhCoB catalysts. (b) Rh 3d, (c) Co 2p and (d) B 1s XPS spectra for the RhCoB catalysts after 10 h V-t stability testing in acidic electrolyte.

**Table S1** Comparison of HER activities in 0.5 M H<sub>2</sub>SO<sub>4</sub> for RhCoB aerogels with other reported Rh-based electrocatalysts.

| Catalyst                                               | Overpotential at<br>10 mA cm <sup>-2</sup> (mV) | Tafel slope<br>( mV dec <sup>-1</sup> ) | Electrolyte                              | Ref.             |
|--------------------------------------------------------|-------------------------------------------------|-----------------------------------------|------------------------------------------|------------------|
| <b>RhCoB aerogels</b>                                  | <b>12</b>                                       | <b>30.7</b>                             | <b>0.5 M H<sub>2</sub>SO<sub>4</sub></b> | <b>This work</b> |
| boron-doped RhFe alloy                                 | 25                                              | 32                                      | 0.5 M H <sub>2</sub> SO <sub>4</sub>     | 1                |
| Rh <sub>2</sub> S <sub>3</sub> hexagonal<br>nanoprisms | 117                                             | 44                                      | 0.5 M H <sub>2</sub> SO <sub>4</sub>     | 2                |
| Rh <sub>2</sub> P electrocatalyst                      | 20                                              | /                                       | 0.5 M H <sub>2</sub> SO <sub>4</sub>     | 3                |
| Rh <sub>2</sub> P-based<br>electrocatalyst             | 14                                              | 31.7                                    | 0.5 M H <sub>2</sub> SO <sub>4</sub>     | 4                |
| Rh-MoS <sub>2</sub><br>nanocomposites                  | 47                                              | 24                                      | 0.5 M H <sub>2</sub> SO <sub>4</sub>     | 5                |
| Rh <sub>x</sub> P/NPC                                  | 19                                              | 36                                      | 0.5 M H <sub>2</sub> SO <sub>4</sub>     | 6                |
| Rh Hollow nanoparticles                                | 28.1                                            | 24                                      | 0.5 M H <sub>2</sub> SO <sub>4</sub>     | 7                |
| Rh-Ag-Si ternary<br>composites                         | 120                                             | 51                                      | 0.5 M H <sub>2</sub> SO <sub>4</sub>     | 8                |
| Rh-Au-Si<br>nanocomposite                              | 60                                              | 24                                      | 0.5 M H <sub>2</sub> SO <sub>4</sub>     | 9                |
| rGO/CoP-Rh catalysts                                   | 72                                              | 43                                      | 0.5 M H <sub>2</sub> SO <sub>4</sub>     | 10               |

**Table S2.** Comparison of HER activities in 1 M KOH for RhCoB aerogels with other reported non-Pt electrocatalysts.

| <b>Catalyst</b>                     | <b>Overpotential at<br/>10 mA cm<sup>-2</sup> (mV)</b> | <b>Tafel slope<br/>( mV dec<sup>-1</sup>)</b> | <b>Electrolyte</b> | <b>Ref.</b>      |
|-------------------------------------|--------------------------------------------------------|-----------------------------------------------|--------------------|------------------|
| <b>RhCoB aerogel</b>                | <b>43</b>                                              | <b>32.1</b>                                   | <b>1 M KOH</b>     | <b>This work</b> |
| RuP <sub>2</sub> @NPC               | 52                                                     | 69                                            | 1 M KOH            | 11               |
| MoS <sub>2</sub> /Ni <sub>3</sub> S | 110                                                    | 31.8                                          | 1 M KOH            | 12               |
| Mo <sub>2</sub> C@NC                | 60                                                     | /                                             | 1 M KOH            | 13               |
| MoP <sub>2</sub> NS/CC              | 85                                                     | 70                                            | 1 M KOH            | 14               |
| Mn-CoP/Ti                           | 76                                                     | 52                                            | 1 M KOH            | 15               |
| NiRu@N-C                            | 50                                                     | 36                                            | 1 M KOH            | 16               |
| CoMoP@C                             | 81                                                     | 55                                            | 1 M KOH            | 17               |
| Rh NSs                              | 43                                                     | 107                                           | 1 M KOH            | 18               |
| NiPS <sub>3</sub> nanoparticles     | 99                                                     | /                                             | 1 M KOH            | 19               |
| Mo <sub>2</sub> C@C nanospheres     | 47                                                     | 71                                            | 1 M KOH            | 20               |



## References

1. L. Zhang, J. Lu, S. Yin, L. Luo, S. Jing, A. Brouzgou, J. Chen, P. K. Shen and P. Tsiakaras, *Appl. Catal. B: Environ.*, 2018, **230**, 58-64.
2. D. Yoon, B. Seo, J. Lee, K. S. Nam, B. Kim, S. Park, H. Baik, S. Hoon Joo and K. Lee, *Energy Environ. Sci.*, 2016, **9**, 850-856.
3. H. Duan, D. Li, Y. Tang, Y. He, S. Ji, R. Wang, H. Lv, P. P. Lopes, A. P. Paulikas, H. Li, S. X. Mao, C. Wang, N. M. Markovic, J. Li, V. R. Stamenkovic and Y. Li, *J. Am. Chem. Soc.*, 2017, **139**, 5494-5502.
4. F. Yang, Y. Zhao, Y. Du, Y. Chen, G. Cheng, S. Chen and W. Luo, *Adv. Energy Mater.*, 2018, **8**, 1703489.
5. Y. Cheng, S. Lu, F. Liao, L. Liu, Y. Li and M. Shao, *Adv. Funct. Mater.*, 2017, **27**, 1700359.
6. Q. Qin, H. Jang, L. Chen, G. Nam, X. Liu and J. Cho, *Adv. Energy Mater.*, 2018, **8**, 1801478.
7. J. Du, X. Wang, C. Li, X.-Y. Liu, L. Gu and H.-P. Liang, *Electrochim. Acta*, 2018, **282**, 853-859.
8. B. Jiang, Y. Sun, F. Liao, W. Shen, H. Lin, H. Wang and M. Shao, *J. Mater. Chem. A*, 2017, **5**, 1623-1628.
9. B. Jiang, L. Yang, F. Liao, M. Sheng, H. Zhao, H. Lin and M. Shao, *Nano Res.*, 2017, **10**, 1749-1755.
10. H. Zheng, X. Huang, H. Gao, W. Dong, G. Lu, X. Chen and G. Wang, *J. Energy Chem.*, 2019, **34**, 72-79.
11. Z. Pu, I. S. Amiinu, Z. Kou, W. Li and S. Mu, *Angew. Chem., Int. Ed.*, 2017, **56**, 11559-11564.
12. J. Zhang, T. Wang, D. Pohl, B. Rellinghaus, R. Dong, S. Liu, X. Zhuang and X. Feng, *Angew. Chem., Int. Ed.*, 2016, **55**, 6702-6707.
13. X. Zou, X. Huang, A. Goswami, R. Silva, B. R. Sathe, E. Mikmekova and T. Asefa, *Angew. Chem., Int. Ed.*, 2014, **53**, 4372-4376.
14. W. Zhu, C. Tang, D. Liu, J. Wang, A. M. Asiri and X. Sun, *J. Mater. Chem. A*, 2016, **4**, 7169-7173.
15. T. Liu, X. Ma, D. Liu, S. Hao, G. Du, Y. Ma, A. M. Asiri, X. Sun and L. Chen, *ACS Catal.*, 2016, **7**, 98-102.
16. Y. Xu, S. Yin, C. Li, K. Deng, H. Xue, X. Li, H. Wang and L. Wang, *J. Mater. Chem. A*, 2018, **6**, 1376-1381.
17. Y.-Y. Ma, C.-X. Wu, X.-J. Feng, H.-Q. Tan, L.-K. Yan, Y. Liu, Z.-H. Kang, E.-B. Wang and Y.-G. Li, *Energy Environ. Sci.*, 2017, **10**, 788-798.
18. N. Zhang, Q. Shao, Y. Pi, J. Guo and X. Huang, *Chem. Mater.*, 2017, **29**, 5009-5015.
19. J. Zhang, R. Cui, X. a. Li, X. Liu and W. Huang, *J. Mater. Chem. A*, 2017, **5**, 23536-23542.
20. Y. Y. Chen, Y. Zhang, W. J. Jiang, X. Zhang, Z. Dai, L. J. Wan and J. S. Hu, *ACS Nano*, 2016, **10**, 8851-8860.
